# Supplementary material for: Poly(vinylidene fluoride)-passivated CsPbBr3 perovskite quantum dots with near-unity photoluminescence quantum yield and superior stability
Source: Royal Society of Chemistry journal article supplement (doi:10.1039/d0tc05103a), 2020-12-23
Supplement: d0tc05103a1.pdf [file d0tc05103a1.pdf]

## Supporting Information

### **Poly(Vinylidene Fluoride)-Passivated CsPbBr<sub>3</sub> Perovskite Quantum Dots with Near-Unity Photoluminescence Quantum Yield and Superior Stability**

Lin Yang,\* Bowen Fu, Xu Li, Hao Chen, and Lili Li,

*College of Physics Science and Technology, Hebei University, Baoding 071002, Hebei, P. R. China*

*\* Corresponding authors. Tel.: +86 312 5077069; fax: +86 312 5077069.*

*E-mail addresses: yanglin@hbu.edu.cn (L.Yang).*

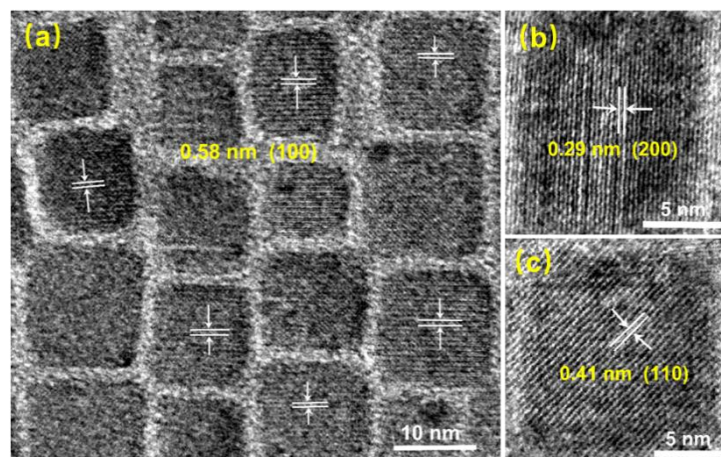

**Figure S1.** HRTEM of PVDF-CsPbBr<sub>3</sub> QDs reflecting the crystal planes of (100), (200), and (110), respectively.

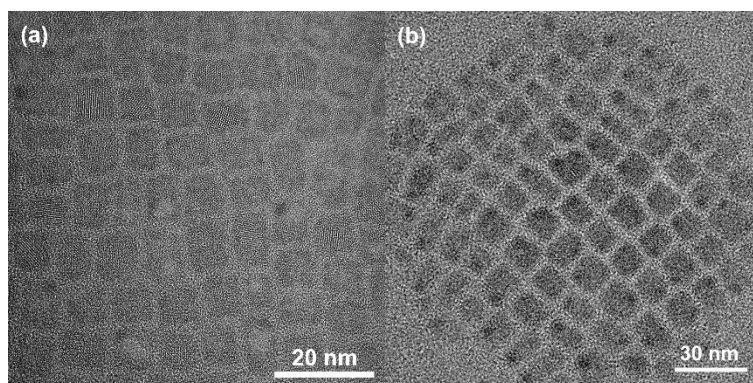

**Figure S2.** TEM images of the (a) pristine CsPbBr<sub>3</sub> and (b) PVDF-CsPbBr<sub>3</sub> QDs after exposure in ambient condition for 60 days

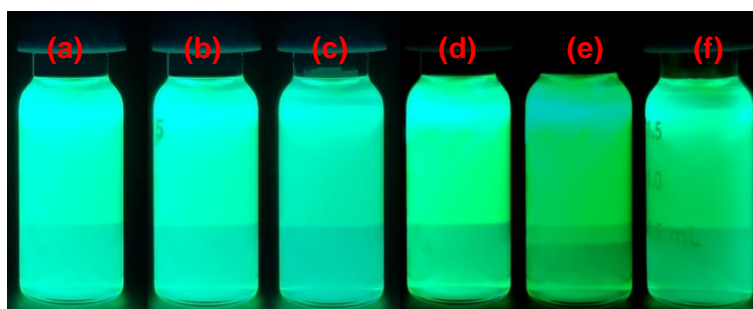

**Figure S3.** Photographs of the pristine CsPbBr<sub>3</sub> QDs samples taken under a UV lamp after exposure in ambient condition for (a) 0, (b) 3, (c) 7, (d) 15, (e) 30, and (f) 60 days, respectively.

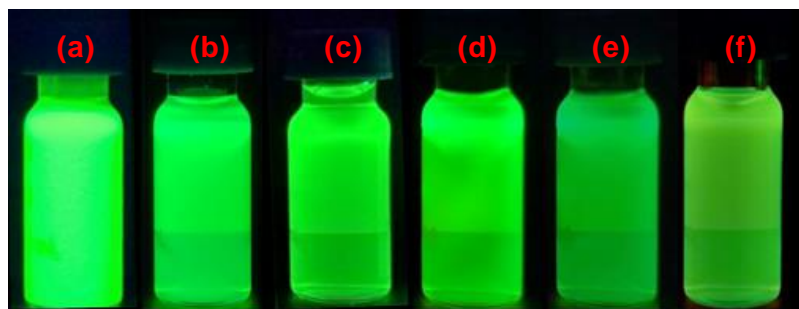

**Figure S4.** Photographs of the PVDF-CsPbBr<sub>3</sub> QDs samples taken under a UV lamp after exposure in ambient condition for (a) 0, (b) 3, (c) 7, (d) 15, (e) 30, and (f) 60 days, respectively.

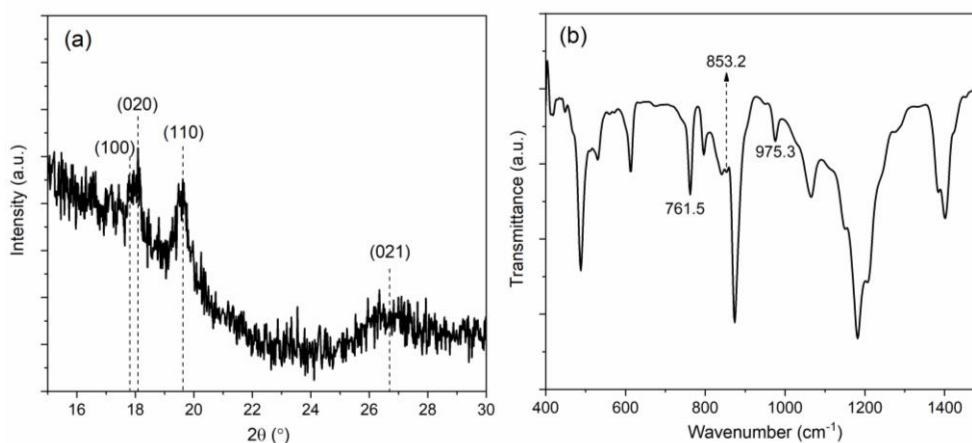

**Figure S5.** XRD pattern and FTIR spectrum of the raw PVDF used in our study.

The raw PVDF exhibit characteristic diffraction pattern for the  $\alpha$ -phase, as shown in Figure S4. It presents three prominent diffraction peaks at 17.8°, 18.1° and 19.6°, which are relative to the (100), (020) and (110) planes of  $\alpha$ -phase, respectively. Additionally, the XRD pattern also shows a diffraction peak of (021) plane at 26.7°, allowing a clear identification of  $\alpha$ -phase PVDF. In addition, the phase of PVDF is most easily detected by FTIR, as it presents a large number of characteristic bands, such as the absorption bands at 761.5 cm<sup>-1</sup> (CF<sub>2</sub> bending), 853.2 cm<sup>-1</sup> (C-C skeletal bending) and 975.3 cm<sup>-1</sup> (CH out-of-plane deformation), which is unavailable for  $\beta$  and  $\gamma$ -phases.

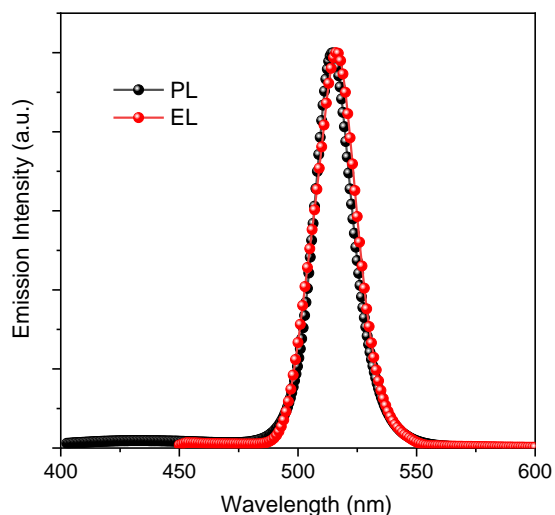

**Figure S6.** PL spectrum of PVDF-CsPbBr<sub>3</sub> film and EL spectrum of PVDF-CsPbBr<sub>3</sub> QLED.

**Table S1.** Fitting parameters of the time-resolved PL decay, PLQY,  $K_{et}$  and  $K_{net}$  values of pristine CsPbBr<sub>3</sub> and PVDF-CsPbBr<sub>3</sub> QDs.

|                              | $A_1$ (%) | $\tau_1$ (ns) | $A_2$ (%) | $\tau_2$ (ns) | $A_3$ (%) | $\tau_3$ (ns) | $\tau_{ave}$ (ns) | PLQY (%) | $K_{et} \times 10^7$ (s <sup>-1</sup> ) | $K_{net} \times 10^7$ (s <sup>-1</sup> ) |
|------------------------------|-----------|---------------|-----------|---------------|-----------|---------------|-------------------|----------|-----------------------------------------|------------------------------------------|
| Pristine CsPbBr <sub>3</sub> | 22.24     | 0.79          | 51.97     | 1.32          | 25.79     | 6.28          | 2.48              | 82       | 33.06                                   | 7.26                                     |
| PVDF-CsPbBr <sub>3</sub>     | 15.15     | 1.68          | 84.85     | 12.32         | –         | –             | 10.71             | 98       | 9.15                                    | 0.19                                     |

**Table S2.** Performance parameters of QLED devices: EL (electroluminescence),  $V_{on}$  (turn-on voltage), L (Luminance), EQE (external quantum efficiency), CE (current efficiency), and PE (power efficiency).

| QDs                          | EL $\lambda_{max}$ (nm) | $V_{on}$ (V) | Max. L (cd m <sup>-2</sup> ) | Max. EQE (%) | Max. CE (cd A <sup>-1</sup> ) | Max. PE (lm W <sup>-1</sup> ) |
|------------------------------|-------------------------|--------------|------------------------------|--------------|-------------------------------|-------------------------------|
| Pristine CsPbBr <sub>3</sub> | 517                     | 3.88         | 5055                         | 0.84         | 1.84                          | 1.80                          |
| PVDF-CsPbBr <sub>3</sub>     | 516                     | 3.93         | 5711                         | 1.71         | 4.25                          | 3.90                          |
